# Supplementary material
Source: MDPI journal article supplement (https://www.mdpi.com/2079-6412/12/9/1344)
Supplement: s1 [file s1]

# Supplementary Materials: A Facile Way to Modify Polyester Fabric to Enhance the Adhesion Behavior to Rubber

Hongwei He <sup>1,2,\*</sup>, Pengfeng Wu <sup>1,2</sup>, Zeguang Yang <sup>1,2</sup>, Zhihao Shi <sup>1,2</sup>, Wenwen Yu <sup>1,2</sup>, Fuyong Liu <sup>1,2</sup>, Fengbo Zhu <sup>1,2</sup>, Qiang Zheng <sup>1,3,\*</sup>, Dezhong Zhang <sup>4,5</sup> and Shumin Li <sup>4,5</sup>

<sup>1</sup> College of Materials Science & Engineering, Taiyuan University of Technology, Taiyuan 030024, China

<sup>2</sup> Key Laboratory of Interface Science and Engineering in Advanced Materials, Ministry of Education, Taiyuan University of Technology, Taiyuan 030024, China

<sup>3</sup> Ministry of Education Key Laboratory of Macromolecular Synthesis and Functionalization, Department of Polymer Science and Engineering, Zhejiang University, Hangzhou 310027, China

<sup>4</sup> Huayang New Material Technology Group Co., Ltd., Yangquan 045000, China

<sup>5</sup> YMC Navalley (Shanxi) Aerogel Science and Innovation City Management Co., Ltd., Yangquan 045000, China

\* Correspondence: hehongwei4103@126.com (H.H.), zhengqiang@zju.edu.cn (Q.Z.)

**Table S1.** The formula of traditional RFL dipping solution.

| Component                  | Dry weight (g) | Wet weight (g) |
|----------------------------|----------------|----------------|
| Resorcinol                 | 11.0           | 11.0           |
| Formaldehyde               | 6.0            | 16.2           |
| Sodium hydroxide           | 0.3            | 3.0            |
| Deionized water            | -              | 235.8          |
| Maturation: 25 °C, 6 h     | 17.3           | 266.0          |
| Ammonia (28%)              | -              | 11.3           |
| Deionized water            | 0              | 59.2           |
| Vinyl-pyridine latex (40%) | 100            | 250            |
| Maturation: 25 °C, 20 h    | 117.3          | 586.5          |

**Table S2.** The Rubber Compound Composition.

| Component                                                        | Content (Phr) |
|------------------------------------------------------------------|---------------|
| SBR                                                              | 70            |
| NR                                                               | 30            |
| Aromatic oil                                                     | 15            |
| Antioxidant (4010NA)                                             | 1.5           |
| Carbon black (N330)                                              | 30            |
| Adhesive RS (Compound of resorcinol and stearic acid)            | 1.5           |
| Silica                                                           | 15            |
| ZnO                                                              | 5             |
| CZ Accelerator CZ(N-Cyclohexyl-2-truxene thiazole sulfonamide)   | 4             |
| SA (Stearic acid))                                               | 2             |
| RA Adhesive (2,4,6-Tris[bis(methoxymethyl)amino]-1,3,5-triazine) | 1.5           |
| Sulfur                                                           | 1             |
| Toatal                                                           | 186.5         |
